# Supplementary material for: Synthesis, DNA Binding and Topoisomerase I Inhibition Activity of Thiazacridine and Imidazacridine Derivatives
Source: PubMed Central journal article supplement (PMC6270168; doi:10.3390/molecules181215035), 2013-12-06

## Supplementary Materials

**Figure S1.** Absorption titration of derivative 4 (50  $\mu\text{M}$ ) with increasing concentrations of ctDNA.  $[\text{DNA}] = 0$  (black), 10 (red), 20 (green), 40 (yellow), 60 (blue), 80 (pink), 100 (light blue) e 120 (gray)  $\mu\text{M}$ . Arrows ( $\downarrow$ ) refer to hypochromic effects. Inset: corresponding to the plot of  $[\text{DNA}]/(\epsilon_a - \epsilon_f)$  as function of DNA concentration as determined from the absorption spectral data.

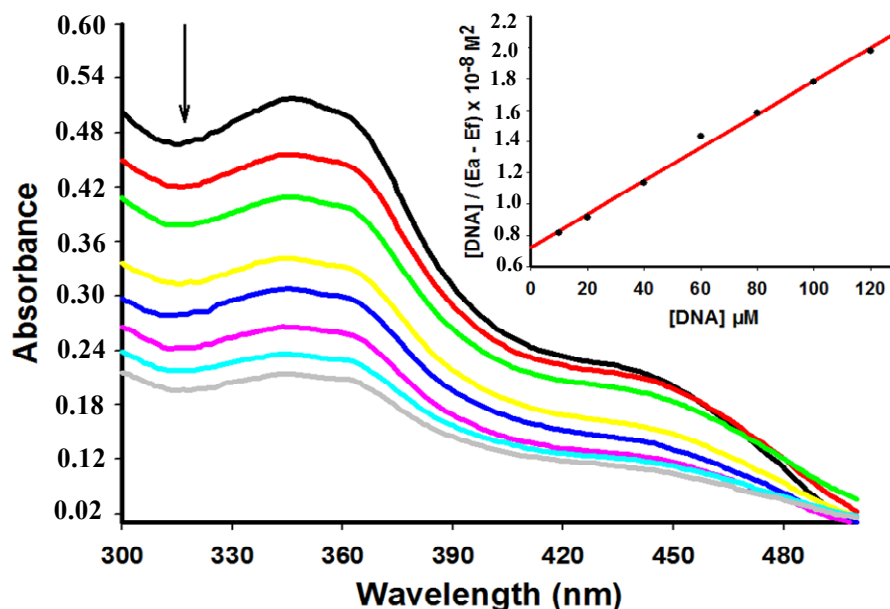

**Figure S2.** Absorption titration of derivative 7 (25  $\mu\text{M}$ ) with increasing concentrations of ctDNA.  $[\text{DNA}] = 0$  (black), 20 (red), 40 (blue), 60 (yellow), 100 (green) e 120 (pink)  $\mu\text{M}$ . Arrows ( $\downarrow$ ) refer to hypochromic effects. Inset: corresponding to the plot of  $[\text{DNA}]/(\epsilon_a - \epsilon_f)$  as function of DNA concentration as determined from the absorption spectral data.

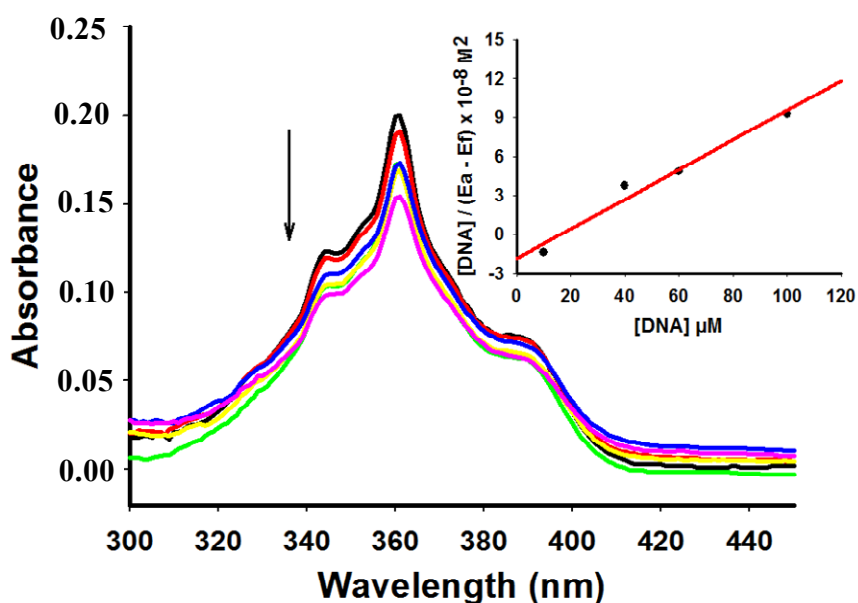

**Figure S3.** Fluorescence changes of derivative 4 (10  $\mu\text{M}$ ) with increasing concentrations of ctDNA. [DNA] = 0 (black), 20 (red), 40 (green), 80 (blue) e 120 (pink)  $\mu\text{M}$ . Insert: corresponding the fluorescence intensity of bound derivative to ctDNA (I) / fluorescence intensity of free derivative ( $I_0$ ).

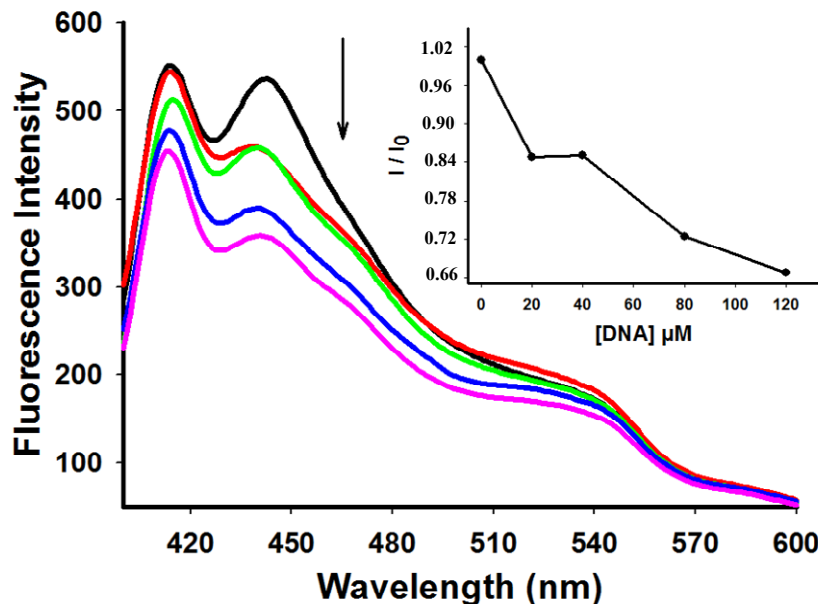

**Figure S4.** Fluorescence spectra of derivative 6 (10  $\mu\text{M}$ ) with increasing concentrations of ctDNA. [DNA] = 0 (black), 20 (red), 40 (green), 80 (yellow) e 120 (blue)  $\mu\text{M}$ . Insert: corresponding the fluorescence intensity of bound derivative to ctDNA (I) / fluorescence intensity of free derivative ( $I_0$ ).

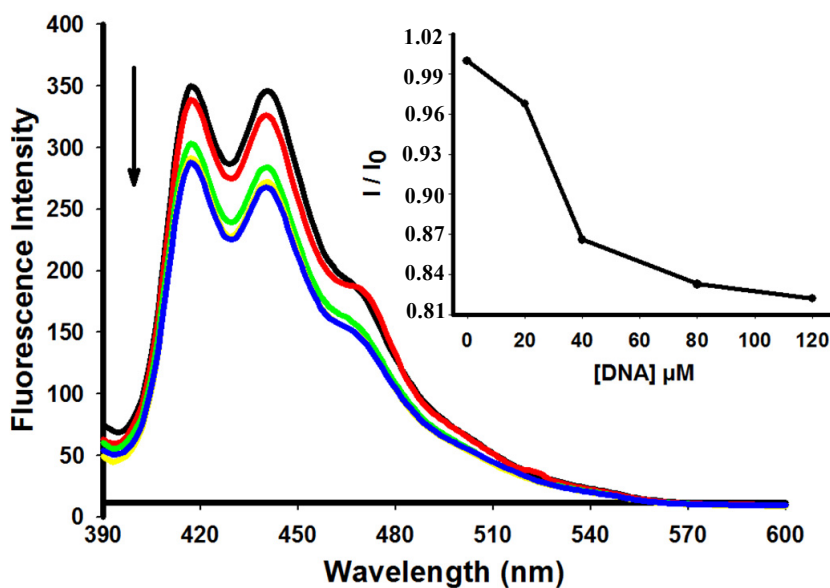

**Figure S5.** Fluorescence changes of derivative 7 (10  $\mu\text{M}$ ) with increasing concentrations of ctDNA. [DNA] = 0 (black), 20 (red), 40 (green), 80 (yellow) e 120 (blue)  $\mu\text{M}$ . Insert: corresponding the fluorescence intensity of bound derivative to ctDNA ( $I$ ) / fluorescence intensity of free derivative ( $I_0$ ).

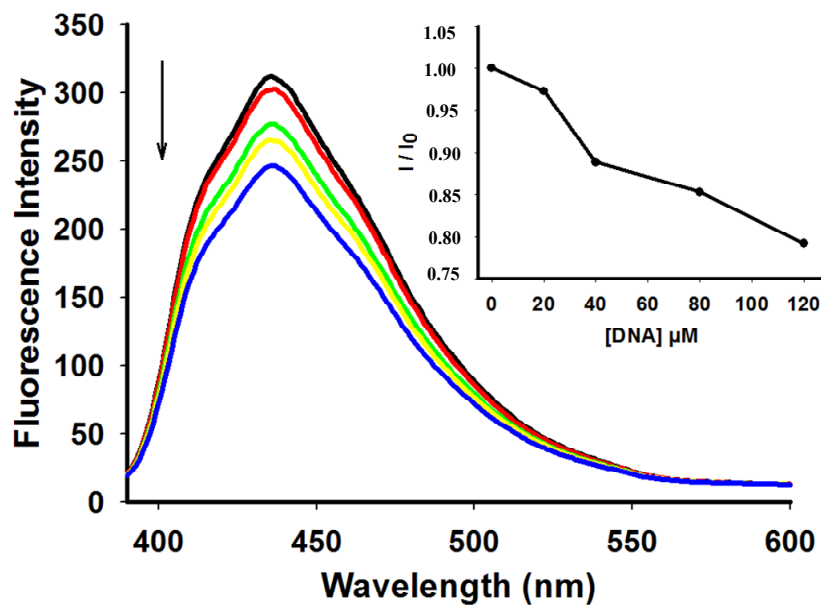

**Figure S6.** Absorption (blue), excitation (black), emission (red) spectra of derivative 4, at concentrations 50, 10 and 10  $\mu\text{M}$ , respectively, in Tris-HCl buffer. Excitation at 360 nm and emission at 415 nm.

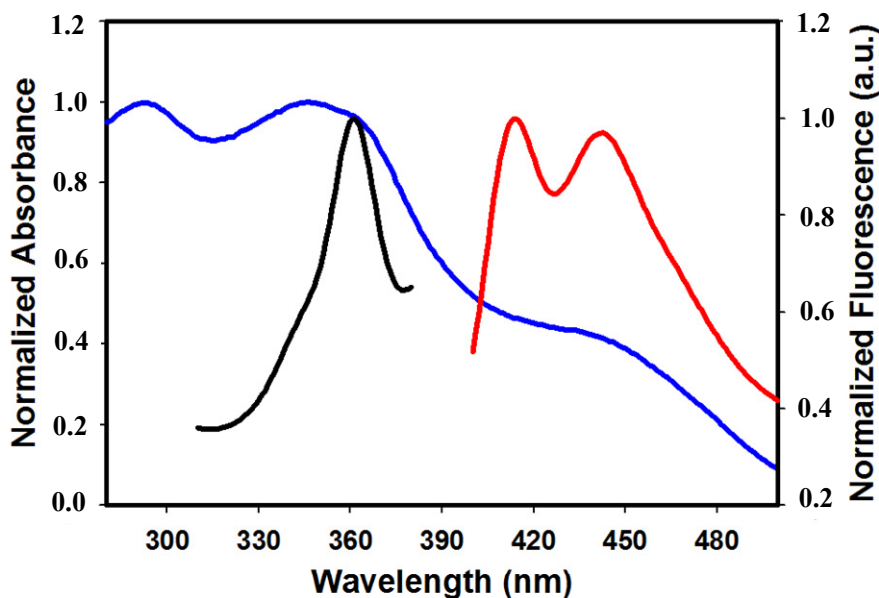

**Figure S7.** Absorption (blue), excitation (black), emission (red) spectra of derivative **5**, at concentrations 50, 10 and 10  $\mu\text{M}$ , respectively, in Tris-HCl buffer. Excitation at 356 nm and emission at 440 nm.

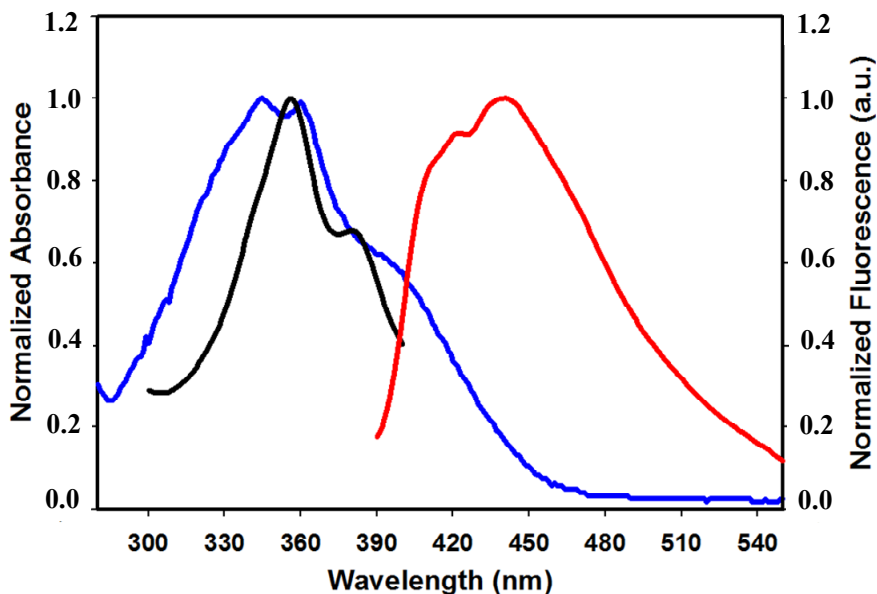

**Figure S8.** Absorption (blue), excitation (black), emission (red) spectra of derivative **5**, at concentrations 25, 10 and 10  $\mu\text{M}$ , respectively, in Tris-HCl buffer. Excitation at 364 nm and emission at 418 nm.

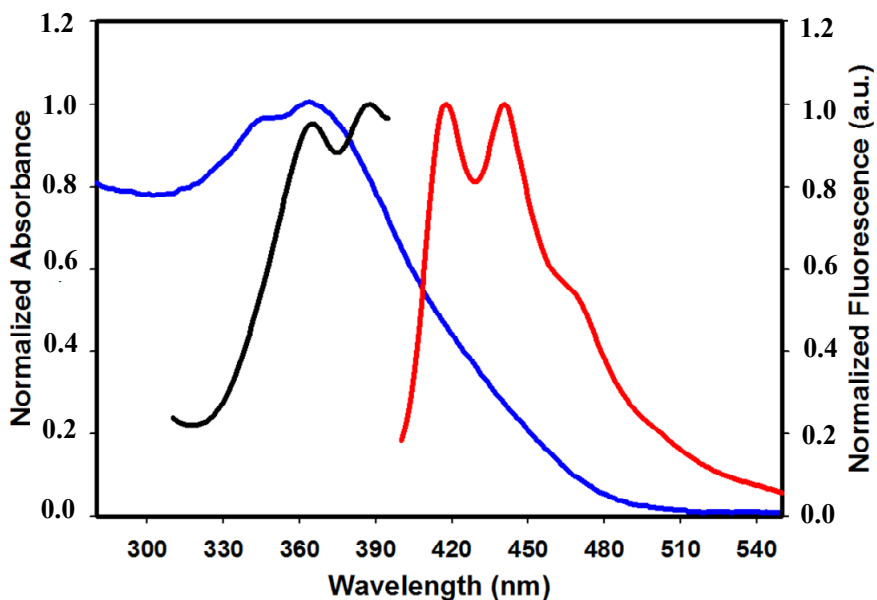

**Figure S9.** Absorption (blue), excitation (black), emission (red) spectra of derivative **5**, at concentrations 25, 10 and 10  $\mu\text{M}$ , respectively, in Tris-HCl buffer. Excitation at 360 nm and emission at 435 nm.

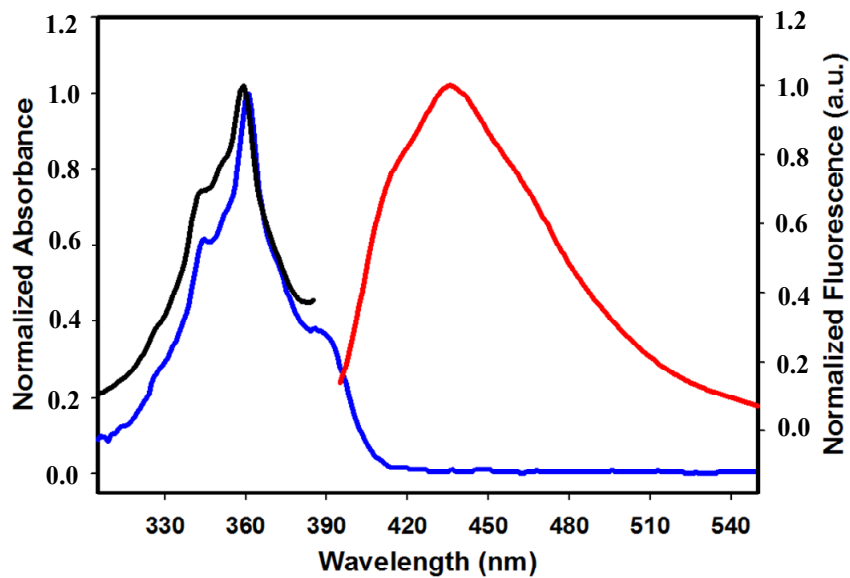

**Figure S10.**  $^{13}\text{C}$ -NMR spectrum (DMSO) of derivative **4**.

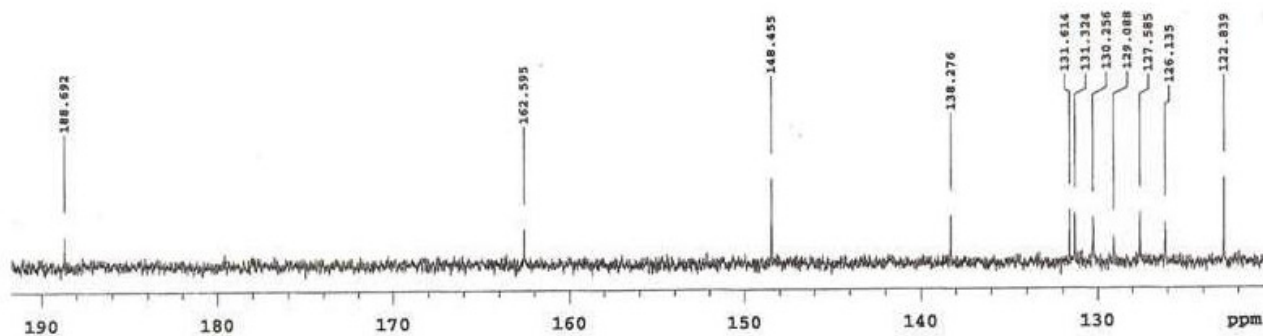

**Figure S11.**  $^1\text{H}$ -NMR spectrum (DMSO) of derivative **4**.

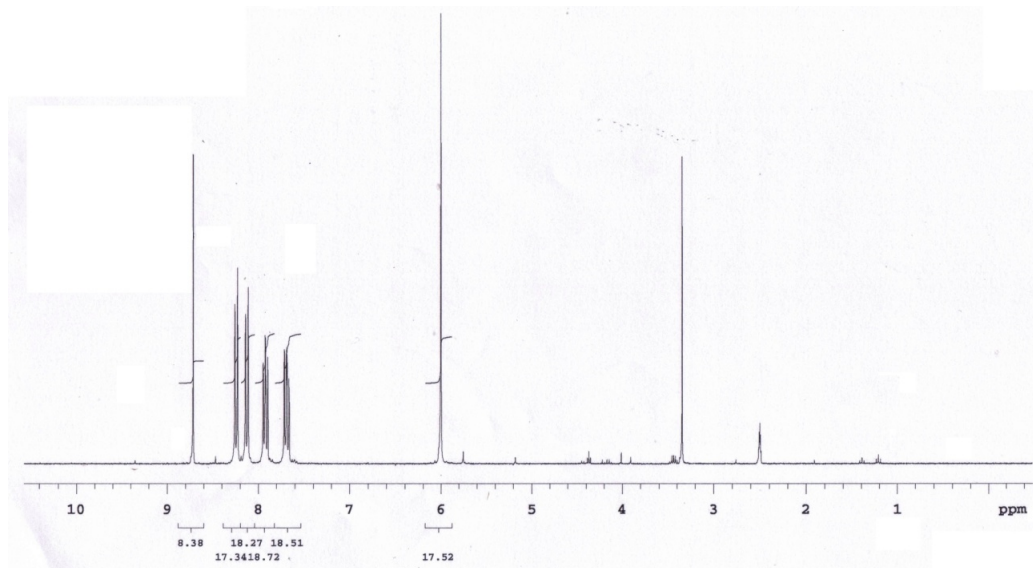

**Figure S12.**  $^{13}\text{C}$ -NMR spectrum (DMSO) of derivative 5.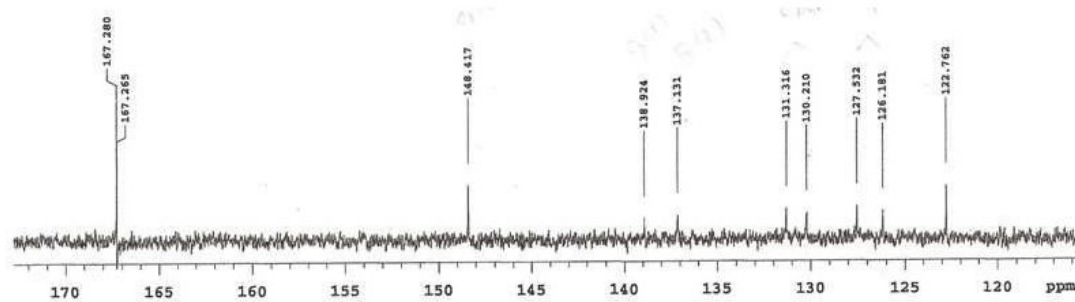**Figure S13.**  $^1\text{H}$ -NMR spectrum (DMSO) of derivative 5.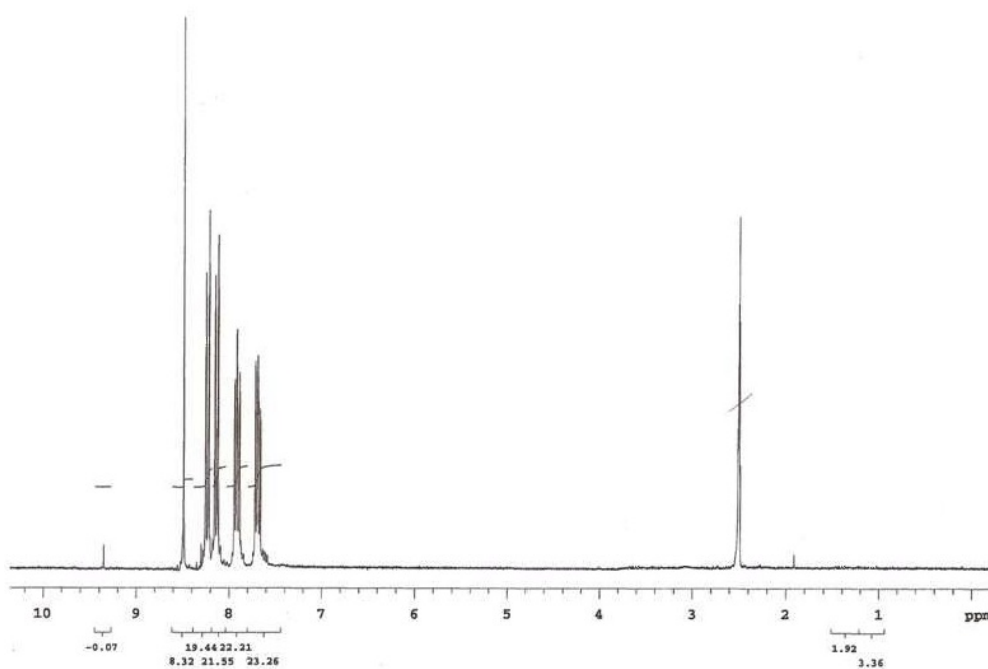**Figure S14.**  $^{13}\text{C}$ -NMR spectrum (DMSO) of derivative 6.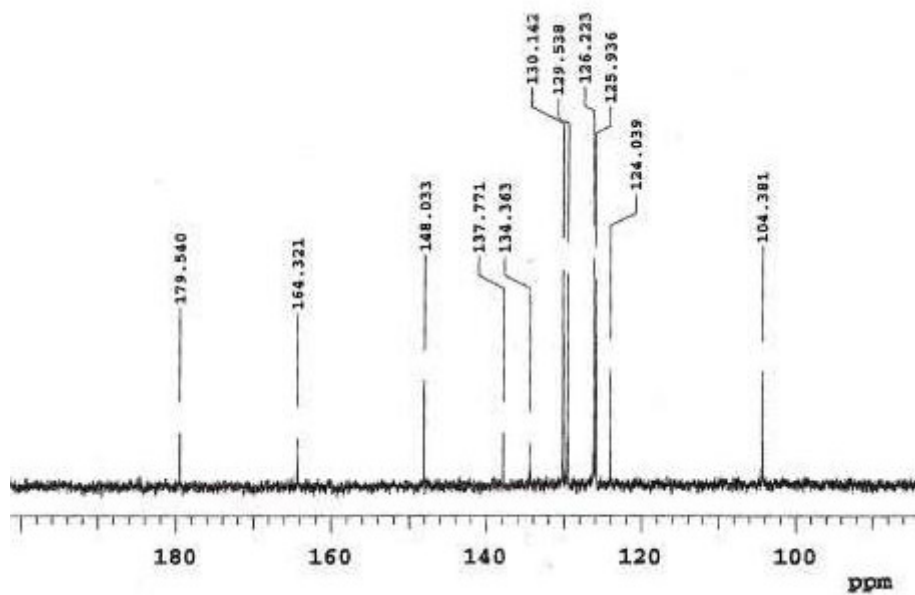

**Figure S15.**  $^1\text{H}$ -NMR spectrum (DMSO) of derivative **6**.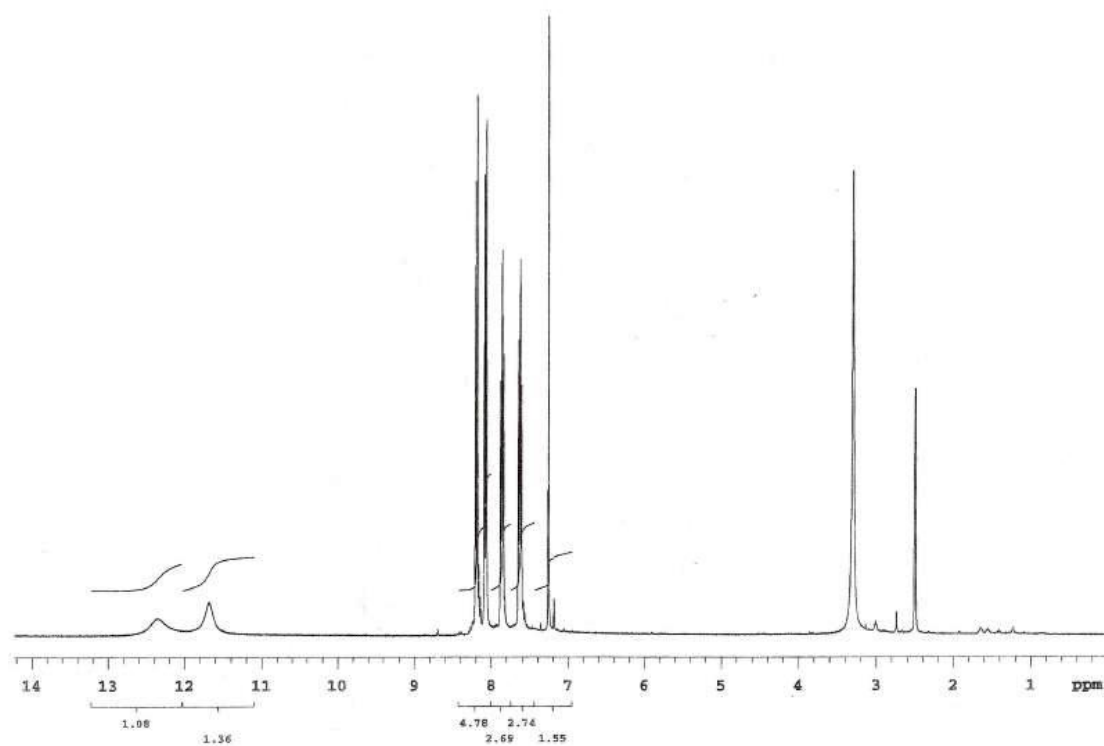

Supplement: molecules-18-15035-s001.pdf [file molecules-18-15035-s001.pdf]
